1 Optimal waist circumference cut-off points for predicting  
2 Metabolic Syndrome among females of reproductive age in  
3 Wakiso district, central Uganda  
4

5

6

7 *Authors*

8 David Lubogo<sup>1\*</sup>, Henry Wamani<sup>1</sup>, Roy William Mayega<sup>2</sup>, Christopher Garimoi Orach<sup>1</sup>  
9

9

10 *Affiliations*

11 <sup>1</sup>Department of Community Health and Behavioural Sciences, School of Public Health,  
12 College of Health Sciences, Makerere University, Kampala, Uganda

13 <sup>2</sup>Department of Epidemiology and Biostatistics, School of Public Health, College of Health  
14 Sciences, Makerere University, Kampala, Uganda

15

16 \* Corresponding author

17 [Lubogodad@yahoo.com](mailto:Lubogodad@yahoo.com)

18

19

20

21

## 22 Abstract

### 23 Background

24 Metabolic Syndrome (MetS) poses a significant challenge to global public health, due to its  
25 strong association with Type 2 diabetes and cardiovascular disease. Waist circumference (WC)  
26 is a convenient metric for diagnosing MetS. Our study sought to establish waist circumference  
27 cut-offs that predict MetS in females of reproductive age residing in Wakiso district in central  
28 Uganda.

### 29 Methods:

30 The data collected were from a cross-sectional study conducted in Wakiso district, central  
31 Uganda, involving 697 randomly selected females aged 15 to 49 between June 9<sup>th</sup> and August  
32 17<sup>th</sup>, 2021. Data included MetS components: WC, High-Density Lipoprotein (HDL)  
33 Cholesterol, triglycerides, blood pressure, and fasting blood sugar. MetS status was identified  
34 based on two or more MetS components excluding WC. ROC analysis established the average  
35 optimal WC. The accuracy and performance of the cut-off points were evaluated through  
36 sensitivity, specificity, Positive likelihood ratio, and the Youden index.

### 37 Results:

38 Of the 697 participants, 49.9% had two or more MetS risk factors. For females aged 15-49  
39 years, the average optimal WC cut-off was 80.3 cm. Variations in optimal WC thresholds were  
40 observed across different age groups: 97.4 cm for (15-24 years), 79.9 cm (25-34 years), 85.6  
41 cm (35-44 years), and 91.1 cm (45-54 years) respectively. The area under the ROC curve for  
42 these age groups ranged from 0.78 to 0.86, indicating good discriminatory capability. The  
43 sensitivity ranged from 85% to 97%, specificity from 58% to 88%, and the Youden Index from  
44 0.557 to 0.729.

45 **Conclusions:**

46 A waist circumference of 80.3 cm is the optimal threshold for identifying Metabolic Syndrome  
47 in females between the ages of 15 and 49 years in the setting. This finding concurs with the  
48 guidance set forth by the International Diabetes Federation.

49 Additionally, study participants had varying WC cut-offs ranging from 79.4 cm to 91.1 cm,  
50 depending on their age.

51

52 **Keywords:** Cut-off points, females, optimal, reproductive age, waist circumference

53

54

## 55 Introduction

56 Metabolic Syndrome (MetS) refers to the accumulation of various risk factors related to cardiac  
57 and metabolic health (1, 2). Among these risk factors is the presence of abdominal obesity, low  
58 HDL Cholesterol, elevated triglycerides, high blood pressure, and elevated fasting blood sugar,  
59 (3, 4). MetS is a significant global public health challenge, contributing to high morbidity and  
60 mortality, additionally, its occurrence is growing in Africa (5-8). The failure to tackle MetS  
61 greatly raises the chances of developing Type 2 diabetes and cardiovascular disease  
62 (9-11). MetS is more prevalent among females than males (6, 9), directly affects their  
63 reproductive role, and contributes to adverse perinatal (12, 13) and maternal outcomes(14).  
64 The measurement of waist circumference (WC) serves as a simple and practical indicator for  
65 assessing abdominal obesity, which is a key component of Metabolic Syndrome (15, 16). The  
66 World Health Organization (WHO) and other scientific organizations strongly recommend  
67 using waist circumference measurement in screening, diagnosis, and routine clinical care to  
68 guide patient management (4, 17). This requires an acceptable waist circumference cut-off for  
69 risk stratification. However, establishing universally accepted WC cut-offs has been  
70 challenging due to differences in abdominal tissue composition among ethnic groups (18). This  
71 is because genetics, environmental, and lifestyle elements could impact abdominal obesity (19)  
72 and overall body composition (20). In the interim, Uganda and other countries in sub-Saharan  
73 Africa use WC cut-offs endorsed by international scientific organizations including the WHO  
74 (3, 20). Nevertheless, it is still unclear whether established thresholds, such as the  $\geq 80$  cm  
75 suggested for females, are valid and appropriate for the African population. Hence, it the  
76 necessary to conduct research on the diverse African population groupings including Uganda  
77 and to establish sex-specific WC cut-offs as recommended by WHO and others (4, 20).

78 To date, most studies on optimal waist circumference cut-off points have been conducted in  
79 high-income countries. In low-income countries such as Uganda, the optimal ethnic WC cut-  
80 off has not been established.

81 Therefore, this study aimed at determining the average waist circumference and age-specific  
82 cut-off points that are optimal for predicting MetS among females of reproductive age in  
83 Wakiso district, central Uganda. The hypothesis for the study was that the optimal waist  
84 circumference for females aged 15-49 years might not be equal to 80.0cm.

85  
86  
87  
88  
89

## 90 **Methods**

### 91 **Study design**

92 We carried out a cross-section study in Wakiso district between June 9, 2021 and August 17,  
93 2021. Our study involved a random sample of female participants from 15 to 49 years of age.

### 94 **Study population**

95 The study population included females aged 15-49 years residing in Wakiso district, central  
96 Uganda. Participants were randomly selected from urban and rural communities to ensure  
97 diversity. Eligible participants had resided in Wakiso for at least a year and were identified  
98 from a database of 800 individuals, who had anthropometric, physical, and biochemical tests  
99 carried out on them to determine the prevalence of MetS in the district.

100 We excluded participants who were pregnant, those within six weeks after childbirth, alcoholics,  
101 smokers, those with chronic diseases such as diabetes mellitus, hypertension, hyperlipidaemia,  
102 allergic disorders, depression, and those with known carrier states of hepatitis B, hepatitis C,  
103 or human Immunodeficiency virus.

### 104 **Study setting**

105 The study was conducted in Wakiso district, situated in central Uganda, with an estimated total  
106 population of 3,105,700, based on the 2014 census. More than half (52.7%) of the residents are  
107 females. Of these, 793,770 are in the reproductive age bracket of 15-49 years (21). The district  
108 comprises two counties, namely Kyaddondo and Busiro, and four Municipal Councils -  
109 Entebbe, Nansana, Kira, and Makindye-Ssabagabo that together constitute eight sub-counties,  
110 eight town councils, 148 parishes, and 704 villages. The Uganda Bureau of Statistics provided  
111 the sampling frame for the study and it included 32 randomly selected enumeration areas in the  
112 district. Twenty-eight (28) households were sampled per enumeration area.

113

## 114 **Sample size calculation**

115 The sample size was computed using the OpenEpi, Version 3.01, open-source calculator for a  
116 proportion or descriptive study (22). Using a population size for a finite population of  
117 1,000,000, confidence limits of 5%, a design effect of 2.0., and a prevalence (p) of 40.2% +/-5  
118 obtained from a study conducted among females in an urban population in Kenya to determine  
119 MetS prevalence (23).

120 A sample size of 739 was obtained; after adjusting for a response rate of 90%, the sample size  
121 was 813. The final sample used in the study was 800 respondents. We estimated a MetS  
122 prevalence of 15% and expected 120 respondents to be with MetS out of the total sample size  
123 of 800. This sample was considered appropriate for assessing the sensitivity and specificity of  
124 WC as a predictor for MetS in this sample.

## 125 **Measurements and variables**

126 We used the population sample data set from a prevalence study to obtain participant data on  
127 anthropometric measurements (waist circumference), physical measurements (blood pressure),  
128 and biochemical measurements (fasting plasma glucose, triglycerides, and low HDL  
129 Cholesterol) collected as per the WHO STEP wise approach (24).

130 Quality control measures were undertaken to ensure the data for the prevalence study were of  
131 quality. They included the employment of well-trained data collectors/research assistants  
132 (female nurses and graduate nutritionists) who were knowledgeable of the study protocol and  
133 had skills in using the Open Data Kit (ODK) for data collection. The data collection tools were  
134 field tested from a district near the study district. The data collected in the field were entered  
135 in the ODK tool embedded with skip patterns and constraints to ensure data quality and reduce  
136 bias. Quantitative data (ODK data) was downloaded from the server and exported to Stata

137 version 14 for cleaning. This ensured reasonable quality control and data management for this  
138 study.

### 139 **Study variables**

#### 140 **Dependent variable:**

141 Metabolic Syndrome was assessed by determining if an individual had three or more of the  
142 five components: low HDL cholesterol or treatment for it, high triglycerides or treatment for  
143 it, elevated fasting blood sugar or diabetes diagnosis, or diabetes treatment; high blood  
144 pressure or treatment for it, and increased waist circumference, as defined in the Joint Interim  
145 Statement (JIS) (4)

#### 146 **Data analysis**

147 Data were analysed using Stata statistical software (SE/14.0, StatCorp, College Station, TX,  
148 USA (25). Descriptive statistics were employed to summarise participant characteristics. Data  
149 on continuous variables were summarized using the independent sample T-test and categorical  
150 variables were analyzed using the Chi-square test. The results were presented as means with  
151 standard deviation and frequencies/percentages, respectively.

152 Waist circumference cut-off points for various age groups (15-45, 15-24, 25-34, 35-44, 45-54  
153 years) were evaluated using sensitivity and specificity techniques to identify the most effective  
154 predictive values for MetS within the study age groups.

155 The research investigated the Area under the Curve (AUC) for different components of MetS  
156 such as elevated fasting blood sugar, high triglycerides, high blood pressure and low HDL  
157 cholesterol. To conduct this analysis, an ROC curve was plotted for the association between  
158 waist circumference (WC) and two or more components of MetS.



159 The optimal cut-off points for WC, which achieves maximum accuracy, were determined by  
160 plotting sensitivity and (1-specificity) on a graph.

161 The study employed the Youden index method (26) expressed as [Maximum (sensitivity +  
162 specificity - 1)] to ascertain the optimal WC values and also calculated the positive predictive  
163 values (PPV) and negative predictive values (NPV).

#### 164 **Ethical considerations**

165 We obtained approval from the Higher Degrees Research and Ethics Committee of the School  
166 of Public Health, College of Health Sciences, Makerere University (Protocal number:  
167 MakSPH-REC, 071) and the National Council for Science and Technology of Uganda  
168 (Registration number: UNCST, HS1281ES). All study participants provided written informed  
169 consent and were assured of the confidentiality of their information.

170

171

172

173

## 174 Results

### 175 Flow of participants

176 The figure in S1 Fig shows the flow diagram of the study participants

### 177 S1 Fig: Flow diagram of study participants

178

### 179 Clinical and biochemical characteristics of the study participants

180 The study involved 697 women of reproductive age. Participants with incomplete data were  
181 not included in the analysis (S6 Fig). On average, they were 29.7 years old ( $\pm 9.07$ ), with a  
182 mean waist circumference of 86.4 cm ( $\pm 13.8$ ) and the mean body mass index (BMI) of 26.9  
183 ( $\pm 5.8$ ). Almost half of the participants (49.9%) exhibited two or more risk factors linked to  
184 MetS ( $\geq 2$  MetS factors), as indicated in Table 1.

185 **Table 1: Clinical and biochemical characteristics of study participants**

| Variables                                                        | Total            |
|------------------------------------------------------------------|------------------|
|                                                                  | Mean $\pm$ SD    |
| Number of participants (%)                                       | 697 (100%)       |
| Age (years)                                                      | 29.7 $\pm$ 9.07  |
| Multiple risk factor aggregation (MRFA) ( $\geq 2$ MetS factors) | 49.93%           |
| Triglyceride (mmol/l)                                            | 1.13 $\pm$ 0.62  |
| HDL cholesterol (mmol/l)                                         | 1.33 $\pm$ 0.38  |
| Fasting blood sugar (mmol/l)                                     | 4.56 $\pm$ 1.16  |
| Body mass index (kg/m <sup>2</sup> )                             | 26.9 $\pm$ 5.8   |
| Systolic BP (mmHg)                                               | 117.6 $\pm$ 15.3 |
| Diastolic BP (mmHg)                                              | 76.3 $\pm$ 11.2  |
| Waist circumference (cm)                                         | 86.4 $\pm$ 13.8  |

186

187

188

189 **Age-specific evaluation of optimal thresholds for waist circumference using different**  
190 **classification metrics**

191 For the age group 15-45 years, the optimal threshold was 80.3 cm. The Youden index,  
192 specificity and sensitivity were 0.604, 67% and 94% respectively, and the AUC curve was  
193 0.848 (95% CI 0.819 - 0.877).

194 The optimal WC cut-off points varied among the various age groups, ranging from 79.4 cm for  
195 females aged 15 to 24 years to 91.1 cm for those aged 45 to 54 years. Across different age  
196 groups, the area under the ROC curve values fluctuated between 0.78 and 0.86, with the 45-  
197 54-year-old age group showing the highest AUC of 0.891. The 45-54 years age group showed  
198 the highest discriminative power (AUC =0.891), with specificity (88 %), Youden index (0.729),  
199 and a likelihood ratio of (7.08), as shown in Table 2.

200 **Table 2: Age -stratified Waist circumference cut-off points and their classification metrics for MetS risk**

| Variables                                                     | Age group             |                      |                      |                       |                       |
|---------------------------------------------------------------|-----------------------|----------------------|----------------------|-----------------------|-----------------------|
|                                                               | 15-24 years           | 25-34 years          | 35-44 years          | 45-54 years           | 15-45 years           |
| Empirical optimal WC cut-off point (cm)                       | 79.4                  | 79.9                 | 85.6                 | 91.1                  | 80.3                  |
| Area under the ROC curve at the cut point                     | 0.83                  | 0.78                 | 0.80                 | 0.86                  | 0.80                  |
| Area under ROC curve (95% CI)                                 | 0.8553(0.803 - 0.907) | 0.804(0.750 - 0.858) | 0.852(0.786 - 0.918) | 0.891 (0.790 - 0.993) | 0.848 (0.819 - 0.877) |
| Sensitivity at cut point (%)                                  | 90                    | 97                   | 85                   | 85                    | 94                    |
| Specificity at cut point (%)                                  | 77                    | 58                   | 75                   | 88                    | 67                    |
| Youden index (J)                                              | 0.665                 | 0.557                | 0.604                | 0.729                 | 0.604                 |
| LR+ = sensitivity / (1 - specificity)                         | 3.913                 | 2.3095               | 3.4                  | 7.08                  | 2.85                  |
| Presence of less than 2 metabolic syndrome risk factors (no.) | 137                   | 134                  | 60                   | 17                    | 348                   |
| Presence of 2 or more metabolic syndrome risk factors (no.)   | 89                    | 118                  | 103                  | 39                    | 349                   |
| <b>Total</b>                                                  | <b>226</b>            | <b>252</b>           | <b>163</b>           | <b>56</b>             | <b>697</b>            |

201

202 **ROC curve analysis, for waist circumference in reproductive-age women in Wakiso**  
203 **district, for detecting MetS risk factors per age group**

204 Figures in S1-S5 Figs show the ROC curves for WC to predict the presence of 2 or more  
205 MetS risk factors among females of reproductive age for the various age groups;

206 **S2 Fig: ROC curve for 15-45 years old females in Wakiso district, 2023**

207 **S3 Fig: ROC curve for 15-24 years old females in Wakiso district, 2023**

208 **S4 Fig: ROC curve for 25-34 years old females in Wakiso district, 2023**

209 **S5 Fig: ROC curve for 35-44 years old females in Wakiso district, 2023**

210 **S6 Fig: ROC curve for 45-54 years old females in Wakiso district, 2023**

211

212

213

## 214 Discussion

215 The rise in the global prevalence of MetS calls for more research towards early and accurate  
216 diagnosis of MetS to provide preventive measures and timely intervention for MetS.

217 Our study revealed that the mean WC cut-off point of 80.3 cm accurately predicted MetS in  
218 females aged 15-49 years in an urban population in Uganda. However, optimal waist  
219 circumference varied by age groups (15-24 years, 25-34 years, 35-44 years, and 45-54 years)  
220 being 79.4 cm, 79.9 cm, 85.6 cm, and 91.1 cm respectively. This study is the first to use the  
221 Joint Interim Statement to establish these cut-off thresholds in Uganda.

222 Our study has identified an optimal WC threshold value that closely approximates the  
223 recommended cut-off of 80.0 cm as specified by the International Diabetes Federation for  
224 diagnosing Metabolic Syndrome (MetS)(27). Similar results have been found in prior studies  
225 conducted across Africa and other locations. An optimal WC of 80.5 cm was found among  
226 female university employees in Angola(28). Elsewhere, some studies among a multiethnic  
227 Malaysian population (29) and in a Japanese population (30) found that 80.0 cm was an optimal  
228 WC for women. The consistency of our findings with those of other researchers strengthens  
229 the validity of our findings and reinforces the global relevance of the established diagnostic  
230 criteria. From a public health perspective, policymakers and healthcare professionals may  
231 utilize these findings to implement cost-effective and efficient screening programs to enable  
232 the early detection and management of MetS.

233 Our findings, however, differed from a study in Ethiopia, which revealed the optimal WC at  
234 78.0 cm (31). Higher optimal WC cut off points of  $\geq 82.3$  cm and 92.0 cm were found in  
235 studies conducted among women in Botswana and South Africa, respectively(15, 32). These  
236 variations underscore the importance of considering region-specific factors when considering  
237 WC cutoff points for assessing women's health. The observed variation might be attributed to  
238 differences in factors such as genetics and body composition across different geographical

239 regions. For instance, countries with higher prevalences of obesity, such as South Africa, often  
240 have higher optimal WC cut-off points (15, 33).

241 This study also revealed varying age-specific WC thresholds for various age groups: 79.4 cm  
242 for people aged 15-24 years, 79.9 cm for those aged 25-34 years, 85.6 cm for the 35-44 age  
243 group, and 91.1 cm for those aged 45-54 years respectively. The age-specific cut-off points  
244 highlight the variability of MetS risk across various age groups. The younger individuals  
245 showed risk factors even with slightly lower waist circumference levels. This emphasizes the  
246 importance of early detection and timely intervention in this group. Conversely, elderly  
247 individuals exhibited higher waist circumference cut-off points. This is in agreement with other  
248 studies (34). Probable reasons for this could be due to changes in body composition with age  
249 resulting in reduced muscle mass and again in body fat, and a reduction in metabolic rate with  
250 age resulting in weight gain if dietary intake and physical activity remained constant.

251 Therefore, to effectively combat the rising burden of cardiovascular diseases, healthcare  
252 providers and policymakers should include age-specific thresholds for waist circumference in  
253 screening and intervention protocols for Metabolic syndrome.

#### 254 **Diagnostic accuracy of the waist circumference cut-off points to detect MetS risk factors**

255 Different metrics were employed to assess the precision of detecting Metabolic Syndrome,  
256 including AUC, PPV, specificity and sensitivity, with reference to a specific waist  
257 circumference threshold.

258 When we measured the performance of the AUC values within the 15-24 age range, the AUC  
259 reached 0.83. This data suggests that the WC cut-off point can serve as a reasonably accurate  
260 indicator of MetS risk in individuals within this age range. For the 25-34 years age group, the  
261 AUC was 0.78, this demonstrates moderate performance. In the 35-44 years age category, the  
262 AUC was 0.80, this suggests a relatively good ability to distinguish those at risk for MetS. In

263 the 45-54 years age group, the AUC was 0.86., this age group exhibited the highest AUC values,  
264 and thus the most robust discriminative power. This suggests that this group may be the most  
265 appropriate target for MetS screening using WC. Considering all individuals aged 15-45 years,  
266 the overall AUC was 0.80, indicating good performance in identifying MetS. Normally, an  
267 AUC of 1 indicates a perfect classifier with the model yielding a 100% true positive rate and  
268 0% false positive rate across all possible threshold values. An AUC of 0 shows that the classifier  
269 performs no better than chance, is not able to distinguish between two classes and yields a 0%  
270 true positive rate and 100% false positive rate (35). Most classifiers aim for an AUC above 0.5,  
271 and that indicates predictive power.

272 These findings hold important implications for healthcare professionals and researchers, as  
273 they provide valuable guidance for developing protocols for screening MetS that are specific  
274 to different age groups.

#### 275 **Effectiveness of waist circumference cut-off points in terms of sensitivity and specificity**

276 Considering sensitivity and specificity values, in the 15-24 age group, a WC of 79.4 cm was  
277 obtained with 90% sensitivity and 77% specificity. The high sensitivity suggests that it is  
278 effective in identifying Metabolic Syndrome. However, the moderate specificity indicates some  
279 potential for false positives.

280 The 25-34 age group showed a WC cut-off of 79.9 cm and had the highest sensitivity of 97%.  
281 This means that nearly all individuals with Metabolic Syndrome in this age group are  
282 accurately identified. However, a lower 58% specificity may imply concerns about potential  
283 false positives, and thus there is a need to do confirmation tests.

284 The 35-44 age category, had an 85.6 cm cut-off, and balanced sensitivity (85%) and specificity  
285 (75%). This implies that it is reasonably practical in identifying those with Metabolic  
286 Syndrome and can minimize the risk of false positives, making it a valuable tool for screening.



287 In the 45-54 age group, there was a 91.1 cm cut-off point, with an 85% sensitivity and 88%  
288 specificity. This implies that this cut-off can accurately identify individuals at risk and can  
289 minimise false positives. For the age range of 15-45 years, we obtained an 80.25 cm cut-off  
290 point, with 94% sensitivity and 67% specificity. This shows that has the potential to serve as  
291 an efficient screening tool. However, the lower specificity of 67% calls for further evaluation  
292 to confirm diagnoses.

293 Generally, these age-specific WC cut-off points can be used to offer tailored strategies for MetS  
294 risk assessment and underscore the importance of age in risk prediction and patient  
295 management. Further research may be needed to validate and expand these findings for broader  
296 clinical and public health applications.

#### 297 **Youden Index and Positive Likelihood Ratios (LR+)**

298 Our study evaluated age-specific waist circumference (WC) cut-off points and their associated  
299 Youden index (J) and Positive Likelihood Ratios (LR+) to determine the diagnostic  
300 performance across different age groups.

301 Our study identified distinctions among the different age categories. The 45-54-year-old age  
302 group showed the highest Youden index (J) of 0.729, indicating a higher overall accuracy than  
303 the other age groups. A value of one (1) indicates perfect accuracy, and the closer J is to 1, the  
304 better the test's overall performance (36). Furthermore, it showed the highest LR+ value of  
305 7.08. This implies that among individuals within this age group, a positive test result is about  
306 7.08 times more likely to occur in individuals with Metabolic Syndrome compared to those  
307 without the syndrome. This makes it a robust diagnostic tool.

308 The 25-34 years age group showed a slightly lower Youden index (J) of 0.557 (indicating  
309 slightly lower overall accuracy) compared to the 15-24 years group with a Youden index (J) of  
310 0.665. The 25-34 years age group showed an LR+ of 2.3095, demonstrating valuable diagnostic

311 utility. A LR+ of 2.3095 suggests that individuals diagnosed with Metabolic Syndrome have a  
312 waist circumference above the cut-off point approximately 2.3 times more often than those  
313 without Metabolic Syndrome. Although this LR+ was slightly lower than the 15-24 years group  
314 LR+ (Likelihood Ratio Positive) of 3.913, this LR+ is still a valuable indicator of diagnostic  
315 strength. The 35-44 years and the broader 15-45 years age range both demonstrated  
316 intermediate Youden index (J) values of 0.604, with corresponding LR+ values of 3.4 and 2.85,  
317 respectively.

318 The study demonstrates that for urban Ugandan females aged 15-49 years, 80.3 cm waist  
319 circumference is the mean optimal threshold for MetS prediction. Furthermore, waist  
320 circumference cut-off points varied depending on age group as indicated; 79.4 cm (15-24  
321 years), 79.9 cm (25-34 years), 85.6 cm (35-44 years), and 91.1 cm (45-54 years). Our findings  
322 provide useful information for healthcare professionals when considering age-tailored risk  
323 assessment strategies for Metabolic Syndrome to enhance the clinical relevance of WC  
324 measurements.

325

326

327

## 328 **Study limitations**

329 We used a cross-sectional study design. MetS is a condition that develops over time, and the  
330 measurement of WC in a single time point may not fully capture its dynamic nature. A  
331 longitudinal study would be more appropriate for confirming the temporal relationships  
332 observed in the study findings.

333 Our study focused exclusively on females of reproductive age in Wakiso district, central  
334 Uganda. Consequently, while the findings are relevant to women in a similar setting, the results  
335 may not be generalizable to the entire Ugandan population. Conducting nationally  
336 representative studies on optimal waist circumference in the future would help address this  
337 limitation and provide a better understanding of MetS in Uganda.

## 338 **Conclusions and recommendations**

339

340 We found that a waist circumference of 80.3 cm was the mean optimal threshold for identifying  
341 Metabolic Syndrome in females between the ages of 15 and 49 years in Wakiso district, central  
342 Uganda. Furthermore, participants exhibited waist circumference cut-offs ranging from 79.4  
343 cm to 91.1 cm based on age group. This study highlights the significance and precision of the  
344 existing waist circumference guidelines in healthcare. This study calls for the utilization of a  
345 waist circumference cut-off threshold to predict Metabolic Syndrome among reproductive-age  
346 females in Uganda, based on age group. The findings of this research may be relevant to  
347 healthcare providers, policymakers, public health practitioners and researchers. Further  
348 research in a wider range of populations encompassing both rural and urban settings is needed  
349 to validate these waist circumference cut-off points.

350

## 351 Acknowledgements

352 We appreciate all the study participants and research assistants who supported the data  
353 collection process. We thank all the local leaders and the district health management team  
354 members in Wakiso district who facilitated the research teams. We appreciate Dr Arthur  
355 Bagonza (PhD) and Dr Freddie Kitutu (PhD) for reviewing the manuscript.

## 356 References

- 357 1. Bovolini A, Garcia J, Andrade MA, Duarte JA. Metabolic syndrome pathophysiology and  
358 predisposing factors. *International Journal of Sports Medicine*. 2021;42(03):199-214.
- 359 2. Wang HH, Lee DK, Liu M, Portincasa P, Wang DQ-H. Novel insights into the pathogenesis and  
360 management of the metabolic syndrome. *Pediatric gastroenterology, hepatology & nutrition*.  
361 2020;23(3):189.
- 362 3. Alberti KGMM, Zimmet P, Shaw J. Metabolic Syndrome—a new world-wide definition. A  
363 consensus statement from the International Diabetes Federation. *Diabetic medicine*. 2006;23(5):469-  
364 80.
- 365 4. Alberti K, Eckel RH, Grundy SM, Zimmet PZ, Cleeman JI, Donato KA, et al. Harmonising the  
366 Metabolic Syndrome a Joint Interim Statement of the International Diabetes Federation Task Force  
367 on Epidemiology and Prevention; National Heart, Lung, and Blood Institute; American Heart  
368 Association; World Heart Federation; International Atherosclerosis Society; and International  
369 Association for the study of Obesity. *Circulation*. 2009;120(16):1640-5.
- 370 5. Okafor CI. The metabolic syndrome in Africa: Current trends. *Indian journal of endocrinology  
371 and metabolism*. 2012;16(1):56-66.
- 372 6. Bowo-Ngandji A, Kenmoe S, Ebogo-Belobo JT, Kenfack-Momo R, Takuissu GR, Kengne-Ndé C,  
373 et al. Prevalence of the metabolic syndrome in African populations: A systematic review and meta-  
374 analysis. *PLoS One*. 2023;18(7):e0289155.
- 375 7. Saklayen MG. The global epidemic of the metabolic syndrome. *Current hypertension reports*.  
376 2018;20(2):1-8.
- 377 8. Noubiap JJ, Nansseu JR, Lontchi-Yimagou E, Nkeck JR, Nyaga UF, Ngouo AT, et al. Geographic  
378 distribution of metabolic syndrome and its components in the general adult population: A meta-  
379 analysis of global data from 28 million individuals. *Diabetes research and clinical practice*.  
380 2022;188:109924.
- 381 9. Faijer-Westerink HJ, Kengne AP, Meeks KA, Agyemang C. Prevalence of metabolic syndrome  
382 in sub-Saharan Africa: A systematic review and meta-analysis. *Nutrition, Metabolism and  
383 Cardiovascular Diseases*. 2020;30(4):547-65.
- 384 10. Hwang Y-C, Jee J-H, Oh EY, Choi Y-H, Lee M-S, Kim K-W, et al. Metabolic syndrome as a  
385 predictor of cardiovascular diseases and type 2 diabetes in Koreans. *International journal of  
386 cardiology*. 2009;134(3):313-21.
- 387 11. Mohamed SM, Shalaby MA, El-Shiekh RA, El-Banna HA, Emam SR, Bakr AF. Metabolic  
388 syndrome: risk factors, diagnosis, pathogenesis, and management with natural approaches. *Food  
389 Chemistry Advances*. 2023;3:100335.
- 390 12. dos Prazeres Tavares H, Dos Santos DCDM, Abbade JF, Negrato CA, De Campos PA, Calderon  
391 IMP, et al. Prevalence of metabolic syndrome in non-diabetic, pregnant Angolan women according to  
392 four diagnostic criteria and its effects on adverse perinatal outcomes. *Diabetology & Metabolic  
393 Syndrome*. 2016;8:1-12.
- 394 13. Bo S, Menato G, Gallo M-L, Bardelli C, Lezo A, Signorile A, et al. Mild gestational  
395 hyperglycemia, the metabolic syndrome and adverse neonatal outcomes. *Acta obstetrica et  
396 gynecologica Scandinavica*. 2004;83(4):335-40.
- 397 14. Grieger JA, Bianco-Miotto T, Grzeskowiak LE, Leemaqz SY, Poston L, McCowan LM, et al.  
398 Metabolic syndrome in pregnancy and risk for adverse pregnancy outcomes: A prospective cohort of  
399 nulliparous women. *PLoS medicine*. 2018;15(12):e1002710.
- 400 15. Crowther NJ, Norris SA. The current waist circumference cut point used for the diagnosis of  
401 metabolic syndrome in sub-Saharan African women is not appropriate. *PloS one*. 2012;7(11):e48883.
- 402 16. Fang H, Berg E, Cheng X, Shen W. How to best assess abdominal obesity. *Current opinion in  
403 clinical nutrition and metabolic care*. 2018;21(5):360.
- 404 17. Ross R, Neeland IJ, Yamashita S, Shai I, Seidell J, Magni P, et al. Waist circumference as a vital  
405 sign in clinical practice: a Consensus Statement from the IAS and ICCR Working Group on Visceral  
406 Obesity. 2020. Report No.: 1759-5029 Contract No.: 3.

- 407 18. Misra A, Wasir JS, Vikram NK. Waist circumference criteria for the diagnosis of abdominal  
408 obesity are not applicable uniformly to all populations and ethnic groups. *Nutrition*. 2005;21(9):969-  
409 76.
- 410 19. Nicolaidis S. Environment and obesity. *Metabolism*. 2019;100:153942.
- 411 20. WHO. Waist circumference and waist-hip ratio: report of a WHO expert consultation,  
412 Geneva, 8-11 December 2008. Geneva; 2011.
- 413 21. UBOS. Population and Censuses Kampala: UBOS; 2020 [Available from:  
414 <https://www.ubos.org/explore-statistics/20/>].
- 415 22. Sullivan K, Dean A. OPENEPI: A Web-based epidemiologic and statistical calculator for Public  
416 Health. 2009; 124: 471–474. 2009.
- 417 23. Kaduka LU, Kombe Y, Kenya E, Kuria E, Bore JK, Bukania ZN, et al. Prevalence of metabolic  
418 syndrome among an urban population in Kenya. *Diabetes Care*. 2012;35(4):887-93.
- 419 24. WHO. WHO STEPS surveillance manual: the WHO STEPwise approach to chronic disease risk  
420 factor surveillance. Geneva: World Health Organization; 2005. Report No.: 9241593830.
- 421 25. StataCorp L. StataCorp stata statistical software: Release 14. StataCorp LP: College Station,  
422 TX, USA. 14.1 ed2015.
- 423 26. Fluss R, Faraggi D, Reiser B. Estimation of the Youden Index and its associated cutoff point.  
424 *Biometrical Journal: Journal of Mathematical Methods in Biosciences*. 2005;47(4):458-72.
- 425 27. Alberti, Kurt George Matthew Mayer, Zimmet Paul, Shaw. J. Metabolic Syndrome—a new  
426 world-wide definition. A consensus statement from the International Diabetes Federation. *Diabetic*  
427 *medicine*. 2006;23(5):469-80.
- 428 28. Magalhaes P, Capingana DP, Mill JG. Prevalence of the metabolic syndrome and  
429 determination of optimal cut-off values of waist circumference in university employees from Angola.  
430 *South African Journal of Diabetes and Vascular Disease*. 2015;12(1):35-40.
- 431 29. Cheong KC, Ghazali SM, Hock LK, Yusoff AF, Selvarajah S, Haniff J, et al. Optimal waist  
432 circumference cut-off values for predicting cardiovascular risk factors in a multi-ethnic Malaysian  
433 population. *Obesity research & clinical practice*. 2014;8(2):e154-e62.
- 434 30. Ogawa D, Kahara K, Shigematsu T, Fujii S, Hayakawa N, Okazaki M, et al. Optimal cut-off point  
435 of waist circumference for the diagnosis of metabolic syndrome in Japanese subjects. *Journal of*  
436 *Diabetes Investigation*. 2010;1(3):117-20.
- 437 31. Sinaga M, Worku M, Yemane T, Tegene E, Wakayo T, Girma T, et al. Optimal cut-off for obesity  
438 and markers of metabolic syndrome for Ethiopian adults. *Nutrition journal*. 2018;17(1):1-12.
- 439 32. Tladi D, Mokgathe L, Shaibu S, Nell T, Mitchell R, Mokgothu C, et al. Determination of  
440 optimal cut-off values for waist circumferences used for the diagnosis of the metabolic syndrome  
441 among Batswana adults (ELS 32). *Cardiovascular Journal of Africa*. 2020;31(6):314-8.
- 442 33. Motala AA, Esterhuizen T, Pirie FJ, Omar MA. The prevalence of metabolic syndrome and  
443 determination of the optimal waist circumference cutoff points in a rural South African community.  
444 *Diabetes care*. 2011;34(4):1032-7.
- 445 34. Subramoney S, Björkelund C, Guo X, Skoog I, Bosaeus I, Lissner L. Age-related differences in  
446 recommended anthropometric cut-off point validity to identify cardiovascular risk factors in  
447 ostensibly healthy women. *Scandinavian journal of public health*. 2014;42(8):827-33.
- 448 35. Kohn MA, Newman TB. The walking man approach to interpreting the receiver operating  
449 characteristic curve and area under the receiver operating characteristic curve. *Journal of Clinical*  
450 *Epidemiology*. 2023;162:182-6.
- 451 36. Shan G. Improved confidence intervals for the Youden index. *PloS one*. 2015;10(7):e0127272.

452

453

454 **Supporting Information**

455 **S1 Fig: ROC curve for 15-45 years old females in Wakiso district, 2023**

456 **S2 Fig: ROC curve for 15-24 years old females in Wakiso district, 2023**

457 **S3 Fig: ROC curve for 25-34 years old females in Wakiso district, 2023**

458 **S4 Fig: ROC curve for 35-44 years old females in Wakiso district, 2023**

459 **S5 Fig: ROC curve for 45-54 years old females in Wakiso district, 2023**

460
